# Supplementary material for: Deep mRNA Sequencing Analysis to Capture the Transcriptome Landscape of Zebrafish Embryos and Larvae
Source: PLoS One. 2013 May 20;8(5):e64058. doi: 10.1371/journal.pone.0064058 (PMC3659048; doi:10.1371/journal.pone.0064058)
Supplement: Table S3 — GO terms of the biological process (BP) category that are significantly enriched among each cluster of developmentally regulated zebrafish genes. (XLS) [file pone.0064058.s012.xls]

## Sheet: readme
Table S3. GO terms of the biological process (BP) category that are Significantly enriched among each cluster of developmentally regulated zebrafish genes
Notation for each column:
GO ID:	Gene ontology (GO) term ID
Term:	Name of the GO term
Annotated:	Number of genes annotated to the GO term in the genome
Observed:	Number of genes annotated to the GO term in the cluster
Expected:	Expected number of genes annotated to the GO term in a random set of genes with size equal to the cluster
Fisher:	P-value of the Fisher's exact test

## Sheet: C1
GO ID	Term	Annotated	Observed	Expected	Fisher
GO:0006412	translation	305	95	48.46	2.3e-10
GO:0007067	mitosis	69	26	10.96	3.2e-07
GO:0051301	cell division	124	35	19.7	1.2e-05
GO:0051726	regulation of cell cycle	118	36	18.75	0.0001
GO:0016311	dephosphorylation	183	34	29.08	0.00026
GO:0032313	regulation of Rab GTPase activity	47	17	7.47	0.00056
GO:0006281	DNA repair	155	51	24.63	0.00066
GO:0045454	cell redox homeostasis	60	19	9.53	0.00175
GO:0009648	photoperiodism	11	7	1.75	0.00188
GO:0006302	double-strand break repair	24	12	3.81	0.00355
GO:0090090	negative regulation of canonical Wnt receptor signaling pathway	11	6	1.75	0.00358
GO:0000724	double-strand break repair via homologous recombination	8	5	1.27	0.0037
GO:0048009	insulin-like growth factor receptor signaling pathway	5	4	0.79	0.004
GO:0048755	branching morphogenesis of a nerve	3	3	0.48	0.00401
GO:0007032	endosome organization	3	3	0.48	0.00401
GO:0045022	early endosome to late endosome transport	3	3	0.48	0.00401
GO:0070936	protein K48-linked ubiquitination	3	3	0.48	0.00401
GO:0006886	intracellular protein transport	338	74	53.7	0.00437
GO:0006694	steroid biosynthetic process	38	12	6.04	0.00459
GO:0051056	regulation of small GTPase mediated signal transduction	268	76	42.58	0.00479
GO:0016192	vesicle-mediated transport	188	57	29.87	0.00483
GO:0032259	methylation	138	31	21.93	0.00485
GO:0007154	cell communication	349	66	55.45	0.00501
GO:0009790	embryo development	585	105	92.95	0.00512
GO:0006505	GPI anchor metabolic process	22	10	3.5	0.00724
GO:0007040	lysosome organization	6	4	0.95	0.00728
GO:0016568	chromatin modification	107	32	17	0.00815
GO:0009058	biosynthetic process	2541	446	403.72	0.00968
GO:0008152	metabolic process	7116	1283	1130.62	0.00996
GO:0008299	isoprenoid biosynthetic process	13	6	2.07	0.00999
GO:0046777	protein autophosphorylation	13	6	2.07	0.00999
GO:0007018	microtubule-based movement	115	28	18.27	0.01209
GO:0007369	gastrulation	153	29	24.31	0.01257
GO:0022008	neurogenesis	288	48	45.76	0.01263
GO:0051567	histone H3-K9 methylation	4	3	0.64	0.01412
GO:0008333	endosome to lysosome transport	4	3	0.64	0.01412
GO:0051225	spindle assembly	4	3	0.64	0.01412
GO:0006476	protein deacetylation	16	6	2.54	0.01484
GO:0019370	leukotriene biosynthetic process	7	4	1.11	0.01485
GO:0006662	glycerol ether metabolic process	18	7	2.86	0.01601
GO:0016310	phosphorylation	1277	222	202.89	0.01626
GO:0060027	convergent extension involved in gastrulation	49	13	7.79	0.0165
GO:0032312	regulation of ARF GTPase activity	32	10	5.08	0.02266
GO:0042274	ribosomal small subunit biogenesis	9	5	1.43	0.02519
GO:0006534	cysteine metabolic process	4	4	0.64	0.0252
GO:0000042	protein targeting to Golgi	2	2	0.32	0.02523
GO:0008616	queuosine biosynthetic process	2	2	0.32	0.02523
GO:0006998	nuclear envelope organization	2	2	0.32	0.02523
GO:0043044	ATP-dependent chromatin remodeling	2	2	0.32	0.02523
GO:0006122	mitochondrial electron transport, ubiquinol to cytochrome c	2	2	0.32	0.02523

## Sheet: C2
GO ID	Term	Annotated	Observed	Expected	Fisher
GO:0006811	ion transport	710	116	66.56	1.5e-09
GO:0055085	transmembrane transport	720	116	67.5	2.5e-09
GO:0035556	intracellular signal transduction	920	128	86.24	1.8e-07
GO:0034587	piRNA metabolic process	6	6	0.56	6.7e-07
GO:0006334	nucleosome assembly	149	31	13.97	1.7e-05
GO:0043046	DNA methylation involved in gamete generation	6	5	0.56	4e-05
GO:0031047	gene silencing by RNA	17	8	1.59	0.00013
GO:0005975	carbohydrate metabolic process	602	65	56.43	0.00034
GO:0007165	signal transduction	2812	312	263.61	0.00061
GO:0030719	P granule organization	4	3	0.37	0.00306
GO:0019885	antigen processing and presentation of endogenous peptide antigen via MHC class I	4	3	0.37	0.00306
GO:0006814	sodium ion transport	91	18	8.53	0.00317
GO:0050974	detection of mechanical stimulus involved in sensory perception	10	5	0.94	0.00394
GO:0007126	meiosis	25	7	2.34	0.00485
GO:0051925	regulation of calcium ion transport via voltage-gated calcium channel activity	19	6	1.78	0.00624
GO:0030522	intracellular receptor mediated signaling pathway	27	6	2.53	0.00658
GO:0000160	two-component signal transduction system (phosphorelay)	9	4	0.84	0.00659
GO:0007155	cell adhesion	450	52	42.18	0.00696
GO:0032355	response to estradiol stimulus	5	3	0.47	0.00711
GO:0060965	negative regulation of gene silencing by miRNA	2	2	0.19	0.00878
GO:0006813	potassium ion transport	130	22	12.19	0.00885
GO:0043401	steroid hormone mediated signaling pathway	77	14	7.22	0.01154
GO:0007281	germ cell development	24	8	2.25	0.01314
GO:0060061	Spemann organizer formation	7	4	0.66	0.01321
GO:0001946	lymphangiogenesis	11	4	1.03	0.01482
GO:0007283	spermatogenesis	17	6	1.59	0.02052
GO:0006820	anion transport	103	13	9.66	0.02058
GO:0006333	chromatin assembly or disassembly	154	33	14.44	0.0241
GO:0006958	complement activation, classical pathway	3	2	0.28	0.0247
GO:0001974	blood vessel remodeling	3	2	0.28	0.0247
GO:0009443	pyridoxal 5'-phosphate salvage	3	2	0.28	0.0247
GO:0032873	negative regulation of stress-activated MAPK cascade	3	2	0.28	0.0247
GO:0030199	collagen fibril organization	3	2	0.28	0.0247
GO:0035315	hair cell differentiation	3	2	0.28	0.0247
GO:0006352	transcription initiation, DNA-dependent	61	10	5.72	0.02854
GO:0070588	calcium ion transmembrane transport	40	8	3.75	0.02987
GO:0006470	protein dephosphorylation	148	21	13.87	0.03058
GO:0048477	oogenesis	25	8	2.34	0.03191
GO:0001707	mesoderm formation	33	8	3.09	0.03196
GO:0035023	regulation of Rho protein signal transduction	109	17	10.22	0.03313
GO:0007205	activation of protein kinase C activity by G-protein coupled receptor protein signaling pathway	14	4	1.31	0.03583
GO:0006182	cGMP biosynthetic process	9	3	0.84	0.04489
GO:0033151	V(D)J recombination	4	2	0.37	0.04635
GO:0048343	paraxial mesodermal cell fate commitment	4	2	0.37	0.04635
GO:0055010	ventricular cardiac muscle tissue morphogenesis	4	2	0.37	0.04635
GO:0007286	spermatid development	4	2	0.37	0.04635
GO:0090103	cochlea morphogenesis	4	2	0.37	0.04635
GO:0035590	purinergic nucleotide receptor signaling pathway	18	3	1.69	0.04637

## Sheet: C3
GO ID	Term	Annotated	Observed	Expected	Fisher
GO:0006508	proteolysis	701	73	46.54	2.1e-07
GO:0001947	heart looping	58	14	3.85	1.9e-05
GO:0040007	growth	184	23	12.22	0.00016
GO:0032088	negative regulation of NF-kappaB transcription factor activity	4	3	0.27	0.00111
GO:0045599	negative regulation of fat cell differentiation	4	3	0.27	0.00111
GO:0071425	hemopoietic stem cell proliferation	4	3	0.27	0.00111
GO:0018149	peptide cross-linking	14	5	0.93	0.00154
GO:0007165	signal transduction	2812	202	186.7	0.00302
GO:0007050	cell cycle arrest	43	7	2.85	0.00403
GO:2000223	regulation of BMP signaling pathway involved in heart jogging	11	4	0.73	0.00437
GO:0050900	leukocyte migration	11	4	0.73	0.00439
GO:0033085	negative regulation of T cell differentiation in thymus	2	2	0.13	0.0044
GO:0021906	hindbrain-spinal cord boundary formation	2	2	0.13	0.0044
GO:0002924	negative regulation of humoral immune response mediated by circulating immunoglobulin	2	2	0.13	0.0044
GO:0002897	positive regulation of central B cell tolerance induction	2	2	0.13	0.0044
GO:0002635	negative regulation of germinal center formation	2	2	0.13	0.0044
GO:0050869	negative regulation of B cell activation	2	2	0.13	0.0044
GO:0045409	negative regulation of interleukin-6 biosynthetic process	2	2	0.13	0.0044
GO:0042130	negative regulation of T cell proliferation	2	2	0.13	0.0044
GO:0035462	determination of left/right asymmetry in diencephalon	2	2	0.13	0.0044
GO:0006334	nucleosome assembly	149	19	9.89	0.00459
GO:0001973	adenosine receptor signaling pathway	7	3	0.46	0.00834
GO:0009798	axis specification	40	10	2.66	0.00842
GO:0030036	actin cytoskeleton organization	116	13	7.7	0.00877
GO:0048264	determination of ventral identity	14	4	0.93	0.01129
GO:0060972	left/right pattern formation	6	3	0.4	0.01261
GO:0032862	activation of Rho GTPase activity	3	2	0.2	0.01263
GO:0048914	myelination of anterior lateral line nerve axons	3	2	0.2	0.01263
GO:0035469	determination of pancreatic left/right asymmetry	3	2	0.2	0.01263
GO:0042664	negative regulation of endodermal cell fate specification	8	3	0.53	0.01269
GO:0060070	canonical Wnt receptor signaling pathway	58	8	3.85	0.01721
GO:0003140	determination of left/right asymmetry in lateral mesoderm	9	3	0.6	0.01811
GO:0042981	regulation of apoptosis	165	13	10.95	0.02071
GO:0048937	lateral line nerve glial cell development	9	4	0.6	0.02407
GO:0035089	establishment of apical/basal cell polarity	4	2	0.27	0.02415
GO:0030513	positive regulation of BMP signaling pathway	4	2	0.27	0.02415
GO:0001707	mesoderm formation	33	6	2.19	0.02451
GO:0007368	determination of left/right symmetry	110	22	7.3	0.02618
GO:0008406	gonad development	31	6	2.06	0.03346
GO:0015671	oxygen transport	19	4	1.26	0.0336
GO:0007154	cell communication	349	34	23.17	0.03681
GO:0016525	negative regulation of angiogenesis	5	2	0.33	0.03849
GO:0016539	intein-mediated protein splicing	5	2	0.33	0.03849
GO:0030325	adrenal gland development	5	2	0.33	0.03849
GO:0048932	myelination of posterior lateral line nerve axons	5	2	0.33	0.03849
GO:0032835	glomerulus development	12	3	0.8	0.04086
GO:0071805	potassium ion transmembrane transport	40	6	2.66	0.0468
GO:0007018	microtubule-based movement	115	13	7.64	0.04811
GO:0006355	regulation of transcription, DNA-dependent	1237	98	82.13	0.04921

## Sheet: C4
GO ID	Term	Annotated	Observed	Expected	Fisher
GO:0006355	regulation of transcription, DNA-dependent	1237	446	262.4	1e-30
GO:0007275	multicellular organismal development	1537	609	326.03	2e-23
GO:0007155	cell adhesion	450	138	95.46	8.5e-09
GO:0043049	otic placode formation	22	16	4.67	3.2e-07
GO:0007420	brain development	218	107	46.24	7.4e-07
GO:0051216	cartilage development	75	37	15.91	1.1e-06
GO:0000122	negative regulation of transcription from RNA polymerase II promoter	20	14	4.24	3.8e-06
GO:0010002	cardioblast differentiation	10	9	2.12	4.1e-06
GO:0007399	nervous system development	477	218	101.18	4.9e-06
GO:0043010	camera-type eye development	144	63	30.55	5.9e-06
GO:0030900	forebrain development	77	40	16.33	7.5e-06
GO:0001570	vasculogenesis	33	19	7	8.3e-06
GO:0015671	oxygen transport	19	13	4.03	1.3e-05
GO:0006754	ATP biosynthetic process	45	17	9.55	2.8e-05
GO:0030878	thyroid gland development	9	8	1.91	3e-05
GO:0045944	positive regulation of transcription from RNA polymerase II promoter	44	21	9.33	8.1e-05
GO:0042221	response to chemical stimulus	376	144	79.76	8.9e-05
GO:0009952	anterior/posterior pattern formation	144	51	30.55	0.00012
GO:0007219	Notch signaling pathway	52	24	11.03	0.00012
GO:0060070	canonical Wnt receptor signaling pathway	58	24	12.3	0.00012
GO:0051091	positive regulation of transcription factor activity	8	7	1.7	0.00013
GO:0030947	regulation of vascular endothelial growth factor receptor signaling pathway	8	7	1.7	0.00013
GO:0009953	dorsal/ventral pattern formation	93	35	19.73	0.00016
GO:0030903	notochord development	41	24	8.7	0.00018
GO:0051258	protein polymerization	52	22	11.03	0.00018
GO:0035118	embryonic pectoral fin morphogenesis	23	13	4.88	0.00023
GO:0010842	retina layer formation	13	9	2.76	0.00027
GO:0001708	cell fate specification	50	30	10.61	0.00035
GO:0048936	peripheral nervous system neuron axonogenesis	12	9	2.55	0.00036
GO:0006096	glycolysis	39	18	8.27	0.00043
GO:0001558	regulation of cell growth	47	25	9.97	0.00044
GO:0048920	posterior lateral line neuromast primordium migration	9	7	1.91	0.00046
GO:0060034	notochord cell differentiation	9	8	1.91	0.00052
GO:0006208	pyrimidine base catabolic process	8	7	1.7	0.00052
GO:0042157	lipoprotein metabolic process	41	13	8.7	0.00053
GO:0007422	peripheral nervous system development	35	24	7.42	0.00059
GO:0007596	blood coagulation	28	17	5.94	0.0006
GO:0045214	sarcomere organization	12	8	2.55	0.00088
GO:0001755	neural crest cell migration	32	15	6.79	0.00106
GO:0007411	axon guidance	67	36	14.21	0.00118
GO:0006836	neurotransmitter transport	58	25	12.3	0.0013
GO:0008406	gonad development	31	13	6.58	0.00146
GO:0030902	hindbrain development	76	41	16.12	0.00147
GO:0007517	muscle organ development	74	35	15.7	0.00155
GO:0035162	embryonic hemopoiesis	34	18	7.21	0.00159
GO:0007179	transforming growth factor beta receptor signaling pathway	29	16	6.15	0.00159
GO:0043401	steroid hormone mediated signaling pathway	77	28	16.33	0.00159
GO:0003333	amino acid transmembrane transport	25	13	5.3	0.00167
GO:0045666	positive regulation of neuron differentiation	8	6	1.7	0.0017
GO:0021984	adenohypophysis development	15	10	3.18	0.00185

## Sheet: C5
GO ID	Term	Annotated	Observed	Expected	Fisher
GO:0006835	dicarboxylic acid transport	14	7	0.66	1.2e-06
GO:0006811	ion transport	710	71	33.3	2e-06
GO:0007601	visual perception	58	13	2.72	2.1e-06
GO:0006508	proteolysis	701	58	32.88	4.5e-06
GO:0055085	transmembrane transport	720	65	33.77	2.7e-05
GO:0055114	oxidation-reduction process	707	57	33.16	3.7e-05
GO:0008152	metabolic process	7116	319	333.79	0.00016
GO:0007602	phototransduction	17	6	0.8	0.00031
GO:0006805	xenobiotic metabolic process	4	3	0.19	0.0004
GO:0018298	protein-chromophore linkage	20	5	0.94	0.00193
GO:0019441	tryptophan catabolic process to kynurenine	2	2	0.09	0.0022
GO:0085033	positive regulation by symbiont of host I-kappaB kinase/NF-kappaB cascade	2	2	0.09	0.0022
GO:0034765	regulation of ion transmembrane transport	63	9	2.96	0.00255
GO:0006813	potassium ion transport	130	16	6.1	0.00307
GO:0006313	transposition, DNA-mediated	7	3	0.33	0.00312
GO:0006836	neurotransmitter transport	58	8	2.72	0.00541
GO:0006810	transport	2008	157	94.19	0.00595
GO:0006814	sodium ion transport	91	12	4.27	0.0074
GO:0044341	sodium-dependent phosphate transport	4	2	0.19	0.01237
GO:0006821	chloride transport	44	6	2.06	0.0161
GO:0006303	double-strand break repair via nonhomologous end joining	5	2	0.23	0.01999
GO:0006857	oligopeptide transport	5	2	0.23	0.01999
GO:0048484	enteric nervous system development	13	3	0.61	0.02066
GO:0006584	catecholamine metabolic process	14	3	0.66	0.02539
GO:0006904	vesicle docking involved in exocytosis	14	3	0.66	0.02539
GO:0055072	iron ion homeostasis	28	5	1.31	0.0289
GO:0015746	citrate transport	6	2	0.28	0.02906
GO:0030259	lipid glycosylation	26	4	1.22	0.03155
GO:0030162	regulation of proteolysis	23	4	1.08	0.03636
GO:0015074	DNA integration	16	3	0.75	0.03645
GO:0071805	potassium ion transmembrane transport	40	5	1.88	0.03794
GO:0006801	superoxide metabolic process	7	2	0.33	0.03943
GO:0006184	GTP catabolic process	329	19	15.43	0.04013
GO:0031279	regulation of cyclase activity	17	3	0.8	0.04276
GO:0050801	ion homeostasis	75	8	3.52	0.04666
GO:0070189	kynurenine metabolic process	3	3	0.14	0.04677
GO:0008210	estrogen metabolic process	7	2	0.33	0.04686
GO:0050860	negative regulation of T cell receptor signaling pathway	1	1	0.05	0.04691
GO:0005980	glycogen catabolic process	1	1	0.05	0.04691
GO:0043390	aflatoxin B1 metabolic process	1	1	0.05	0.04691
GO:0015855	pyrimidine base transport	1	1	0.05	0.04691
GO:0034436	glycoprotein transport	1	1	0.05	0.04691
GO:0030195	negative regulation of blood coagulation	1	1	0.05	0.04691
GO:0045931	positive regulation of mitotic cell cycle	1	1	0.05	0.04691
GO:0006742	NADP catabolic process	1	1	0.05	0.04691
GO:0055064	chloride ion homeostasis	1	1	0.05	0.04691
GO:0006863	purine base transport	1	1	0.05	0.04691

## Sheet: C6
GO ID	Term	Annotated	Observed	Expected	Fisher
GO:0007156	homophilic cell adhesion	198	67	9.51	1e-30
GO:0007186	G-protein coupled receptor protein signaling pathway	1035	112	49.7	8.6e-13
GO:0006278	RNA-dependent DNA replication	18	7	0.86	1.1e-05
GO:0007218	neuropeptide signaling pathway	89	13	4.27	0.00031
GO:0002504	antigen processing and presentation of peptide or polysaccharide antigen via MHC class II	14	5	0.67	0.00035
GO:0006955	immune response	175	22	8.4	0.00051
GO:0006811	ion transport	710	41	34.09	0.00057
GO:0006471	protein ADP-ribosylation	23	6	1.1	0.0006
GO:0030259	lipid glycosylation	26	6	1.25	0.00121
GO:0006486	protein glycosylation	107	13	5.14	0.00182
GO:0022029	telencephalon cell migration	2	2	0.1	0.0023
GO:0061381	cell migration in diencephalon	2	2	0.1	0.0023
GO:0021855	hypothalamus cell migration	2	2	0.1	0.0023
GO:0061374	mammillothalamic axonal tract development	2	2	0.1	0.0023
GO:0061379	inferior colliculus development	2	2	0.1	0.0023
GO:0008542	visual learning	2	2	0.1	0.0023
GO:0045359	positive regulation of interferon-beta biosynthetic process	2	2	0.1	0.0023
GO:0010216	maintenance of DNA methylation	2	2	0.1	0.0023
GO:0031100	organ regeneration	2	2	0.1	0.0023
GO:0007049	cell cycle	302	12	14.5	0.00386
GO:0016567	protein ubiquitination	131	14	6.29	0.0057
GO:0060487	lung epithelial cell differentiation	3	2	0.14	0.00669
GO:0006437	tyrosyl-tRNA aminoacylation	3	2	0.14	0.00669
GO:0051085	chaperone mediated protein folding requiring cofactor	9	3	0.43	0.00745
GO:0071875	adrenergic receptor signaling pathway	9	3	0.43	0.00745
GO:0048511	rhythmic process	23	4	1.1	0.01025
GO:0009103	lipopolysaccharide biosynthetic process	162	15	7.78	0.01129
GO:0060441	epithelial tube branching involved in lung morphogenesis	4	2	0.19	0.01295
GO:0045087	innate immune response	25	5	1.2	0.01925
GO:0007412	axon target recognition	5	2	0.24	0.0209
GO:0006525	arginine metabolic process	5	2	0.24	0.0209
GO:0015684	ferrous iron transport	35	5	1.68	0.02476
GO:0035589	G-protein coupled purinergic nucleotide receptor signaling pathway	14	3	0.67	0.027
GO:0010817	regulation of hormone levels	27	4	1.3	0.03028
GO:0032496	response to lipopolysaccharide	7	3	0.34	0.03028
GO:0015074	DNA integration	16	3	0.77	0.03869
GO:0006468	protein phosphorylation	1074	61	51.57	0.03956
GO:0043524	negative regulation of neuron apoptosis	7	2	0.34	0.04117
GO:0007160	cell-matrix adhesion	55	6	2.64	0.04737
GO:0045187	regulation of circadian sleep/wake cycle, sleep	1	1	0.05	0.04802
GO:0030186	melatonin metabolic process	1	1	0.05	0.04802
GO:0031663	lipopolysaccharide-mediated signaling pathway	1	1	0.05	0.04802
GO:0052331	hemolysis in other organism involved in symbiotic interaction	1	1	0.05	0.04802
GO:0046716	muscle cell homeostasis	1	1	0.05	0.04802
