# Supplementary material for: Deep mRNA Sequencing Analysis to Capture the Transcriptome Landscape of Zebrafish Embryos and Larvae
Source: PLoS One. 2013 May 20;8(5):e64058. doi: 10.1371/journal.pone.0064058 (PMC3659048; doi:10.1371/journal.pone.0064058)
Supplement: Table S5 — GO terms of the BP catergory that are enriched among genes preferentially expressed in one developmental stage. (XLS) [file pone.0064058.s014.xls]

## Sheet: 64&128-cell
GO ID	Term	Annotated	Observed	Expected	Fisher
GO:0006869	lipid transport	74	7	0.59	2e-06
GO:0032355	response to estradiol stimulus	5	3	0.04	4.9e-06
GO:0009410	response to xenobiotic stimulus	15	2	0.12	0.0062
GO:0007050	cell cycle arrest	43	3	0.34	0.0079
GO:0001510	RNA methylation	17	2	0.14	0.008
GO:0060294	cilium movement involved in cell motility	1	1	0.01	0.008
GO:0035694	mitochondrial protein catabolic process	1	1	0.01	0.008
GO:0035695	mitochondrion degradation by induced vacuole formation	1	1	0.01	0.008
GO:0044030	regulation of DNA methylation	1	1	0.01	0.008
GO:0033133	positive regulation of glucokinase activity	1	1	0.01	0.008
GO:0046849	bone remodeling	2	1	0.02	0.0159
GO:0008209	androgen metabolic process	2	1	0.02	0.0159
GO:0060965	negative regulation of gene silencing by miRNA	2	1	0.02	0.0159
GO:0001682	tRNA 5'-leader removal	2	1	0.02	0.0159
GO:0043967	histone H4 acetylation	3	1	0.02	0.0238
GO:0070935	3'-UTR-mediated mRNA stabilization	3	1	0.02	0.0238
GO:0090116	C-5 methylation of cytosine	3	1	0.02	0.0238
GO:0006470	protein dephosphorylation	148	4	1.18	0.031
GO:0007286	spermatid development	4	1	0.03	0.0316
GO:0008053	mitochondrial fusion	4	1	0.03	0.0316
GO:0051567	histone H3-K9 methylation	4	1	0.03	0.0316
GO:0030719	P granule organization	4	1	0.03	0.0316
GO:0019885	antigen processing and presentation of endogenous peptide antigen via MHC class I	4	1	0.03	0.0316
GO:0042989	sequestering of actin monomers	4	1	0.03	0.0316
GO:0045739	positive regulation of DNA repair	5	1	0.04	0.0394
GO:0034587	piRNA metabolic process	6	1	0.05	0.0471
GO:0031572	G2/M transition DNA damage checkpoint	6	1	0.05	0.0471
GO:0006703	estrogen biosynthetic process	6	1	0.05	0.0471
GO:0043046	DNA methylation involved in gamete generation	6	1	0.05	0.0471

## Sheet: oblong-sphere
GO ID	Term	Annotated	Observed	Expected	Fisher
GO:0060061	Spemann organizer formation	7	2	0.08	0.0023
GO:0000724	double-strand break repair via homologous recombination	8	2	0.09	0.0031
GO:0006310	DNA recombination	68	6	0.73	0.0038
GO:0003140	determination of left/right asymmetry in lateral mesoderm	9	2	0.1	0.004
GO:0045743	positive regulation of fibroblast growth factor receptor signaling pathway	10	2	0.11	0.0049
GO:0006281	DNA repair	155	8	1.67	0.0079
GO:0008595	anterior/posterior axis specification, embryo	5	2	0.05	0.0107
GO:0045737	positive regulation of cyclin-dependent protein kinase activity	1	1	0.01	0.0108
GO:0035249	synaptic transmission, glutamatergic	1	1	0.01	0.0108
GO:0007090	regulation of S phase of mitotic cell cycle	1	1	0.01	0.0108
GO:0007252	I-kappaB phosphorylation	1	1	0.01	0.0108
GO:0006360	transcription from RNA polymerase I promoter	1	1	0.01	0.0108
GO:0050709	negative regulation of protein secretion	1	1	0.01	0.0108
GO:0018117	protein adenylylation	1	1	0.01	0.0108
GO:0045634	regulation of melanocyte differentiation	2	1	0.02	0.0215
GO:0043966	histone H3 acetylation	2	1	0.02	0.0215
GO:0048320	axial mesoderm formation	2	1	0.02	0.0215
GO:0006352	transcription initiation, DNA-dependent	61	3	0.66	0.0281
GO:0030199	collagen fibril organization	3	1	0.03	0.032
GO:0001502	cartilage condensation	3	1	0.03	0.032
GO:0042058	regulation of epidermal growth factor receptor signaling pathway	3	1	0.03	0.032
GO:0071679	commissural neuron axon guidance	3	1	0.03	0.032
GO:0001974	blood vessel remodeling	3	1	0.03	0.032
GO:0006388	tRNA splicing, via endonucleolytic cleavage and ligation	3	1	0.03	0.032
GO:0043967	histone H4 acetylation	3	1	0.03	0.032
GO:0007190	activation of adenylate cyclase activity	3	1	0.03	0.032
GO:0006420	arginyl-tRNA aminoacylation	3	1	0.03	0.032
GO:0009190	cyclic nucleotide biosynthetic process	46	3	0.5	0.0409
GO:0030719	P granule organization	4	1	0.04	0.0425
GO:0046835	carbohydrate phosphorylation	4	1	0.04	0.0425
GO:0007286	spermatid development	4	1	0.04	0.0425
GO:0055010	ventricular cardiac muscle tissue morphogenesis	4	1	0.04	0.0425
GO:0009312	oligosaccharide biosynthetic process	4	1	0.04	0.0425
GO:0021754	facial nucleus development	4	1	0.04	0.0425
GO:0048343	paraxial mesodermal cell fate commitment	4	1	0.04	0.0425
GO:0032312	regulation of ARF GTPase activity	32	2	0.35	0.0464
GO:0000902	cell morphogenesis	221	7	2.38	0.0474

## Sheet: 50%-epiboly
GO ID	Term	Annotated	Observed	Expected	Fisher
GO:2000223	regulation of BMP signaling pathway involved in heart jogging	11	5	0.23	1.6e-06
GO:0001947	heart looping	58	9	1.21	2.8e-06
GO:0009952	anterior/posterior pattern formation	144	22	3	4.8e-06
GO:0006334	nucleosome assembly	149	13	3.1	1.4e-05
GO:0009953	dorsal/ventral pattern formation	93	15	1.94	1.4e-05
GO:0001707	mesoderm formation	33	8	0.69	5.2e-05
GO:0001702	gastrulation with mouth forming second	31	5	0.65	5.4e-05
GO:0001756	somitogenesis	79	10	1.64	8.5e-05
GO:0048264	determination of ventral identity	14	4	0.29	0.00016
GO:0045893	positive regulation of transcription, DNA-dependent	101	11	2.1	0.00016
GO:0048382	mesendoderm development	6	3	0.12	0.00017
GO:0001678	cellular glucose homeostasis	6	3	0.12	0.00017
GO:0035050	embryonic heart tube development	88	14	1.83	0.00018
GO:0009948	anterior/posterior axis specification	16	4	0.33	0.00027
GO:0031016	pancreas development	51	9	1.06	0.00033
GO:0021906	hindbrain-spinal cord boundary formation	2	2	0.04	0.00043
GO:0048389	intermediate mesoderm development	2	2	0.04	0.00043
GO:0042664	negative regulation of endodermal cell fate specification	8	3	0.17	0.00046
GO:0001944	vasculature development	178	9	3.7	0.00067
GO:0043049	otic placode formation	22	4	0.46	0.001
GO:0010159	specification of organ position	3	2	0.06	0.00128
GO:0039023	pronephric duct morphogenesis	3	2	0.06	0.00128
GO:0008078	mesodermal cell migration	11	3	0.23	0.0013
GO:0006355	regulation of transcription, DNA-dependent	1237	52	25.74	0.00169
GO:0060030	dorsal convergence	12	3	0.25	0.00171
GO:0030514	negative regulation of BMP signaling pathway	13	3	0.27	0.00219
GO:0021999	neural plate anterior/posterior regionalization	4	2	0.08	0.00252
GO:0070121	Kupffer's vesicle development	28	4	0.58	0.00254
GO:0060028	convergent extension involved in axis elongation	15	3	0.31	0.00337
GO:0007420	brain development	218	21	4.54	0.00367
GO:0008406	gonad development	31	4	0.65	0.00371
GO:0001889	liver development	35	5	0.73	0.00413
GO:0032099	negative regulation of appetite	5	2	0.1	0.00414
GO:0000186	activation of MAPKK activity	5	2	0.1	0.00414
GO:0014028	notochord formation	5	2	0.1	0.00414
GO:0008343	adult feeding behavior	5	2	0.1	0.00414
GO:0016055	Wnt receptor signaling pathway	114	10	2.37	0.00444
GO:0016049	cell growth	78	5	1.62	0.00606
GO:0021535	cell migration in hindbrain	6	2	0.12	0.00613
GO:0046685	response to arsenic-containing substance	6	2	0.12	0.00613
GO:0040007	growth	184	12	3.83	0.00667
GO:0009267	cellular response to starvation	19	3	0.4	0.00675
GO:0009790	embryo development	585	47	12.17	0.00697
GO:0048793	pronephros development	46	6	0.96	0.00761
GO:0060061	Spemann organizer formation	7	2	0.15	0.00846
GO:0060070	canonical Wnt receptor signaling pathway	58	6	1.21	0.00997
GO:0048596	embryonic camera-type eye morphogenesis	13	3	0.27	0.01106
GO:0045666	positive regulation of neuron differentiation	8	2	0.17	0.01112
GO:0007368	determination of left/right symmetry	110	14	2.29	0.01269
GO:0003140	determination of left/right asymmetry in lateral mesoderm	9	2	0.19	0.01411

## Sheet: 15-somite
GO ID	Term	Annotated	Observed	Expected	Fisher
GO:0006355	regulation of transcription, DNA-dependent	1237	23	8.87	1.7e-05
GO:0035462	determination of left/right asymmetry in diencephalon	2	2	0.01	5.1e-05
GO:0001570	vasculogenesis	33	4	0.24	8.7e-05
GO:0018149	peptide cross-linking	14	3	0.1	0.00012
GO:0060217	hemangioblast cell differentiation	4	2	0.03	0.0003
GO:0060216	definitive hemopoiesis	6	2	0.04	0.00075
GO:0048570	notochord morphogenesis	13	3	0.09	0.00136
GO:0030099	myeloid cell differentiation	47	5	0.34	0.00168
GO:0003140	determination of left/right asymmetry in lateral mesoderm	9	2	0.06	0.00177
GO:0007519	skeletal muscle tissue development	33	5	0.24	0.00303
GO:0007275	multicellular organismal development	1537	37	11.02	0.00335
GO:0045647	negative regulation of erythrocyte differentiation	1	1	0.01	0.00717
GO:0045603	positive regulation of endothelial cell differentiation	1	1	0.01	0.00717
GO:0061372	activin receptor signaling pathway involved in heart jogging	1	1	0.01	0.00717
GO:0021874	Wnt receptor signaling pathway involved in forebrain neuroblast division	1	1	0.01	0.00717
GO:0010830	regulation of myotube differentiation	1	1	0.01	0.00717
GO:0051124	synaptic growth at neuromuscular junction	1	1	0.01	0.00717
GO:0009052	pentose-phosphate shunt, non-oxidative branch	1	1	0.01	0.00717
GO:0032926	negative regulation of activin receptor signaling pathway	1	1	0.01	0.00717
GO:0019368	fatty acid elongation, unsaturated fatty acid	1	1	0.01	0.00717
GO:0021561	facial nerve development	1	1	0.01	0.00717
GO:0045429	positive regulation of nitric oxide biosynthetic process	1	1	0.01	0.00717
GO:0060214	endocardium formation	1	1	0.01	0.00717
GO:0001947	heart looping	58	3	0.42	0.0083
GO:0035162	embryonic hemopoiesis	34	4	0.24	0.00943
GO:0001568	blood vessel development	158	8	1.13	0.01245
GO:0015697	quaternary ammonium group transport	2	1	0.01	0.01429
GO:0021904	dorsal/ventral neural tube patterning	2	1	0.01	0.01429
GO:0010084	specification of organ axis polarity	2	1	0.01	0.01429
GO:0030223	neutrophil differentiation	2	1	0.01	0.01429
GO:0048823	nucleate erythrocyte development	2	1	0.01	0.01429
GO:0030240	skeletal muscle thin filament assembly	2	1	0.01	0.01429
GO:0042761	very long-chain fatty acid biosynthetic process	2	1	0.01	0.01429
GO:0042759	long-chain fatty acid biosynthetic process	2	1	0.01	0.01429
GO:0021766	hippocampus development	2	1	0.01	0.01429
GO:0071340	skeletal muscle nicotinic acetylcholine receptor clustering	2	1	0.01	0.01429
GO:0030903	notochord development	41	5	0.29	0.01614
GO:0035469	determination of pancreatic left/right asymmetry	3	1	0.02	0.02135
GO:0048769	sarcomerogenesis	3	1	0.02	0.02135
GO:0006189	'de novo' IMP biosynthetic process	3	1	0.02	0.02135
GO:0043282	pharyngeal muscle development	3	1	0.02	0.02135
GO:0060971	embryonic heart tube left/right pattern formation	3	1	0.02	0.02135
GO:0002074	extraocular skeletal muscle development	3	1	0.02	0.02135
GO:0030225	macrophage differentiation	3	1	0.02	0.02135
GO:0030241	skeletal muscle myosin thick filament assembly	3	1	0.02	0.02135
GO:0039023	pronephric duct morphogenesis	3	1	0.02	0.02135
GO:0040007	growth	184	4	1.32	0.02158
GO:0003007	heart morphogenesis	96	5	0.69	0.02477
GO:0061053	somite development	83	2	0.59	0.02825
GO:0071425	hemopoietic stem cell proliferation	4	1	0.03	0.02837

## Sheet: 72hpf
GO ID	Term	Annotated	Observed	Expected	Fisher
GO:0006355	regulation of transcription, DNA-dependent	1237	21	7.66	8.7e-05
GO:0021884	forebrain neuron development	6	2	0.04	0.00056
GO:0030282	bone mineralization	7	2	0.04	0.00078
GO:0043401	steroid hormone mediated signaling pathway	77	4	0.48	0.00132
GO:0048570	notochord morphogenesis	13	2	0.08	0.00283
GO:0006835	dicarboxylic acid transport	14	2	0.09	0.00329
GO:0003094	glomerular filtration	1	1	0.01	0.00619
GO:0071929	alpha-tubulin acetylation	1	1	0.01	0.00619
GO:0031103	axon regeneration	1	1	0.01	0.00619
GO:0042462	eye photoreceptor cell development	21	2	0.13	0.00738
GO:0046671	negative regulation of retinal cell programmed cell death	2	1	0.01	0.01235
GO:0032922	circadian regulation of gene expression	3	1	0.02	0.01847
GO:0007155	cell adhesion	450	6	2.79	0.01945
GO:0034755	iron ion transmembrane transport	5	1	0.03	0.03059
GO:0043433	negative regulation of transcription factor activity	5	1	0.03	0.03059
GO:0006635	fatty acid beta-oxidation	5	1	0.03	0.03059
GO:0007026	negative regulation of microtubule depolymerization	6	1	0.04	0.0366
GO:0030512	negative regulation of transforming growth factor beta receptor signaling pathway	7	1	0.04	0.04257

## Sheet: 1-week
GO ID	Term	Annotated	Observed	Expected	Fisher
GO:0055114	oxidation-reduction process	707	161	78.48	4.6e-20
GO:0007601	visual perception	58	24	6.44	4.2e-10
GO:0006508	proteolysis	701	126	77.81	8.4e-09
GO:0008152	metabolic process	7116	835	789.9	4e-08
GO:0006879	cellular iron ion homeostasis	22	12	2.44	7.5e-07
GO:0030259	lipid glycosylation	26	12	2.89	7.3e-06
GO:0007602	phototransduction	17	11	1.89	3.6e-05
GO:0071918	urea transmembrane transport	9	6	1	0.00012
GO:0030162	regulation of proteolysis	23	12	2.55	0.00013
GO:0018298	protein-chromophore linkage	20	9	2.22	0.00013
GO:0015793	glycerol transport	6	4	0.67	0.00189
GO:0010951	negative regulation of endopeptidase activity	28	9	3.11	0.00242
GO:0006833	water transport	15	6	1.67	0.00382
GO:0015672	monovalent inorganic cation transport	273	40	30.3	0.00395
GO:0018106	peptidyl-histidine phosphorylation	7	4	0.78	0.00401
GO:0006805	xenobiotic metabolic process	4	3	0.44	0.00501
GO:0006562	proline catabolic process	4	3	0.44	0.00501
GO:0015696	ammonium transport	4	3	0.44	0.00501
GO:0043085	positive regulation of catalytic activity	101	15	11.21	0.00778
GO:0006096	glycolysis	39	10	4.33	0.00859
GO:0006525	arginine metabolic process	5	3	0.56	0.01149
GO:0009072	aromatic amino acid family metabolic process	15	9	1.67	0.01192
GO:0018105	peptidyl-serine phosphorylation	4	4	0.44	0.01229
GO:0061381	cell migration in diencephalon	2	2	0.22	0.01231
GO:0061374	mammillothalamic axonal tract development	2	2	0.22	0.01231
GO:0061379	inferior colliculus development	2	2	0.22	0.01231
GO:0021855	hypothalamus cell migration	2	2	0.22	0.01231
GO:0006559	L-phenylalanine catabolic process	2	2	0.22	0.01231
GO:0009586	rhodopsin mediated phototransduction	2	2	0.22	0.01231
GO:0019441	tryptophan catabolic process to kynurenine	2	2	0.22	0.01231
GO:0031100	organ regeneration	2	2	0.22	0.01231
GO:0048280	vesicle fusion with Golgi apparatus	2	2	0.22	0.01231
GO:0045359	positive regulation of interferon-beta biosynthetic process	2	2	0.22	0.01231
GO:0022029	telencephalon cell migration	2	2	0.22	0.01231
GO:0010216	maintenance of DNA methylation	2	2	0.22	0.01231
GO:0060564	negative regulation of mitotic anaphase-promoting complex activity	2	2	0.22	0.01231
GO:0001580	detection of chemical stimulus involved in sensory perception of bitter taste	2	2	0.22	0.01231
GO:0085033	positive regulation by symbiont of host I-kappaB kinase/NF-kappaB cascade	2	2	0.22	0.01231
GO:0008542	visual learning	2	2	0.22	0.01231
GO:0033138	positive regulation of peptidyl-serine phosphorylation	2	2	0.22	0.01231
GO:0055123	digestive system development	56	5	6.22	0.01236
GO:0006835	dicarboxylic acid transport	14	5	1.55	0.0142
GO:0015746	citrate transport	6	3	0.67	0.02108
GO:0006537	glutamate biosynthetic process	6	3	0.67	0.02108
GO:0042572	retinol metabolic process	6	3	0.67	0.02108
GO:0055085	transmembrane transport	720	104	79.92	0.0212
GO:0006955	immune response	175	27	19.43	0.02252
GO:0006836	neurotransmitter transport	58	12	6.44	0.02363
GO:0031279	regulation of cyclase activity	17	5	1.89	0.03313
GO:0006313	transposition, DNA-mediated	7	3	0.78	0.03389

## Sheet: readme
Table S5. GO terms of the BP catergory that are enriched among genes preferentially expressed in one developmental stage
Notation for each column:
GO ID:	Gene ontology (GO) term ID
Term:	Name of the GO term
Annotated:	Number of genes annotated to the GO term in the genome
Observed:	Number of genes annotated to the GO term in the cluster
Expected:	Expected number of genes annotated to the GO term in a random set of genes with size equal to the cluster
Fisher:	P-value of the Fisher's exact test
